# Supplementary material
Source: HighWire-hosted journal article supplement (http://molpharm.aspetjournals.org/highwire/filestream/76335/field_highwire_adjunct_files/1/10.1124_mol.104.005496_SUPP_TABLE_2.pdf)
Supplement: 10.1124_mol.104.005496_SUPP_TABLE_2.pdf [file 10.1124_mol.104.005496_SUPP_TABLE_2.pdf]

SUPPLEMENTAL TABLE 2

Genes coordinately regulated by WY in wild-type and PPAR $\alpha$ -null mice

Anderson SP, Dunn C, Laughter A, Yoon L, Swanson C, Stulnig TM, Steffensen KR, Chandraratna RAS, Gustafsson J-A, and Corton JC (2004)  
*Mol Pharmacol* doi:10.1124/mol.104.005496.

| Gene Name | Gene Description                  | Sequence Code | Accession # | WT-WY | P-value        | KO-WY | P-value    |
|-----------|-----------------------------------|---------------|-------------|-------|----------------|-------|------------|
| Actg      | actin, gamma, cytoplasmic         | 96573_at      | M21495      | 1.53  | 1.39E-14       | 1.28  | 0.000801   |
| Hspd1     | heat shock protein 1 (chaperonin) | 93277_at      | X53584      | 1.45  | 0 <sup>a</sup> | 1.17  | 0          |
|           | Mus musculus, clone IMAGE:3586350 | 94823_at      | AI835315    | 1.25  | 0.00000573     | 1.16  | 0.000602   |
| D5Ert593e | DNA segment, Chr 5, ERATO Doi 593 | 104116_at     | AW124049    | 1.19  | 0              | 1.41  | 0          |
| Rpl7      | ribosomal protein L7              | 97696_r_at    | M29015      | 1.19  | 0.000000627    | 1.15  | 0.00000018 |
| Prdx6     | peroxiredoxin 6                   | 100622_at     | AF093857    | 1.09  | 0              | 1.18  | 0.000881   |
| Fah       | fumarylacetoacetate hydrolase     | 98588_at      | Z11774      | -1.09 | 0.000278       | -1.12 | 0          |
| Asgr1     | asialoglycoprotein receptor 1     | 93433_s_at    | D13517      | -1.22 | 0.0000656      | -1.21 | 0.0000269  |
| Hal       | histidine ammonia lyase           | 92833_at      | L07645      | -1.34 | 9.98E-08       | -1.41 | 0.0000366  |
| Ahsg      | alpha-2-HS-glycoprotein           | 99862_at      | AF025821    | -1.36 | 1.61E-20       | -1.15 | 0.000388   |
| Asl       | argininosuccinate lyase           | 104566_at     | AI845009    | -1.43 | 1.65E-09       | -1.24 | 0.00000294 |

<sup>a</sup>Represent p values < 10<sup>-45</sup> calculated by Rosetta Resolver.
